# Supplementary material for: Microfluidic Diffusion Sizing Applied to the Study of Natural Products and Extracts That Modulate the SARS-CoV-2 Spike RBD/ACE2 Interaction
Source: MDPI journal article supplement (doi:10.3390/molecules28248072), 2023-12-13
Supplement: s1 [file s1]

## Supplementary Materials

### “Microfluidic Diffusional Sizing applied to the study of natural products and extracts that modulate the SARS-CoV-2 SpikeRBD/ACE2 interaction”

#### Method validation

##### 1. Selectivity

To evaluate the selectivity of the developed MDS method, 3 samples were analyzed: SpikeRBD<sub>labelled</sub> at 507 nM, ACE2 at 750 nM, and a mix PBS:Tween 20 (99.95:0.05, v/v) (=PBS-T) as Blank. Each analysis was performed in 3 replicates. We then compared the electropherograms from each analysis.

**Figure S1 Electropherograms of the 3 samples: Fluorescence-labelled SpikeRBD (SpikeRBD<sub>labelled</sub>), concentration = 507 nM; ACE2, concentration = 750 nM ; PBS-T.**

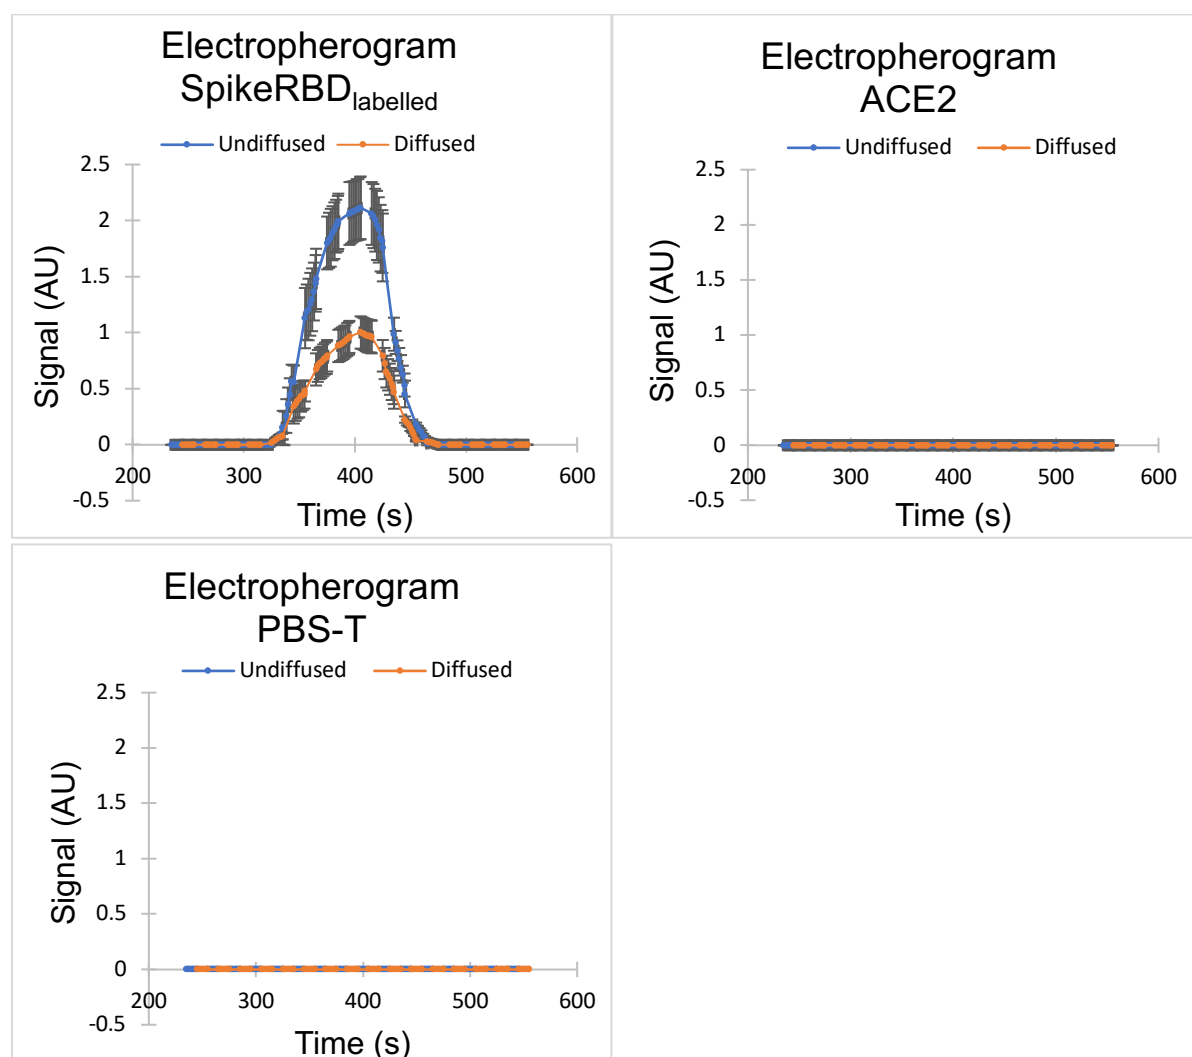

Microfluidic Diffusional Sizing: evolution of fluorescence in the diffused and undiffused channels as a function of time (mean  $\pm$  SD; n = 3). Arbitrary unit abbreviated as AU.

These 3 electropherograms (Figure S1) indicate that, of these 3 samples, only the SpikeRBD<sub>labelled</sub> yields a detectable signal, allowing a determination of  $R_h$ . The method is then selective towards the fluorescent analyte. Also, at the working wavelengths of the apparatus ( $\lambda_{\text{Excitation}}$ , 630 nm;  $\lambda_{\text{Emission}}$ , 694 nm), there is a very low number of natural products that will fluoresce or quench the incident and emitted radiation («*Quenching*»). For all subsequent analyses, this was systematically checked by monitoring the signal.

## 2. Reproducibility

Since the technology is relatively recent, the reproducibility of disposable chips was assessed, as well as their limits. To do this, the following 3 tests were carried out:

- Use of a single chip to measure each data point  
(*Analysis of the fluorescently labelled SpikeRBD = SpikeRBD<sub>labelled</sub>*)

**Table S1 One chip per data point – Reproducibility**

| Sample                           | t° of chip (°C) | [SpikeRBD <sub>labelled</sub> ] (nM) | Hydrodynamic radius ( $R_h$ ) (nm) |
|----------------------------------|-----------------|--------------------------------------|------------------------------------|
| Labelling 1 – 2022/01/19 (n = 3) | 23.1            | 50                                   | 3.03                               |
|                                  | 22.3            | 50                                   | 2.94                               |
|                                  | 21.1            | 50                                   | 2.74                               |
| Labelling 2 – 2022/02/18 (n = 3) | 22.6            | 50                                   | 2.76                               |
|                                  | 23.3            | 50                                   | 2.93                               |
|                                  | 21.9            | 50                                   | 2.82                               |
| Mean                             |                 |                                      | 2.87                               |
| Standard Deviation               |                 |                                      | 0.11                               |
| Relative Standard Deviation (%)  |                 |                                      | 3.99                               |

Measure of SpikeRBD  $R_h$  using 1 chip per data point. Mean, standard deviation, and relative standard deviation.

- Use of a single chip to repeatedly measure data points  
(*Analysis of the fluorescently labelled SpikeRBD = SpikeRBD<sub>labelled</sub>*)

Between each measurement, the remaining traces of the previous sample were carefully removed using a micropipette.

**Table S2 One chip to measure several data points**

| Sample                          | [SpikeRBD <sub>labelled</sub> ] (nM) | R <sub>h</sub> (nm) |
|---------------------------------|--------------------------------------|---------------------|
| Chip 1 – measure (n = 8)        | 507                                  | 3.07                |
|                                 | 507                                  | 3.05                |
|                                 | 507                                  | 1.98                |
|                                 | 507                                  | 3.14                |
|                                 | 507                                  | 2.80                |
|                                 | 507                                  | 1.36                |
|                                 | 507                                  | 2.93                |
|                                 | 507                                  | 4.41                |
| Mean                            |                                      | 2.84                |
| Standard deviation              |                                      | 0.89                |
| Relative Standard Deviation (%) |                                      | 31.4                |

Measure of SpikeRBD R<sub>h</sub> using 1 chip for all data points. Mean, standard deviation, and relative standard deviation.

A very low reproducibility was observed for these repeated measurements, although the analyses were performed at a 10 times higher concentration, compared to Table S1. This is probably explained by the presence of air bubbles in the microfluidic channels.

- Use of a single chip to analyze a full affinity curve to determine K<sub>D</sub>

All the samples required for the K<sub>D</sub> determination of the SpikeRBD/ACE2 protein complex were injected on a single chip. Each data point was analyzed in 3 replicates and measurements were performed in ascending order of ACE2 concentrations. Between each measurement, the remaining traces of the previous sample were carefully removed using a micropipette.

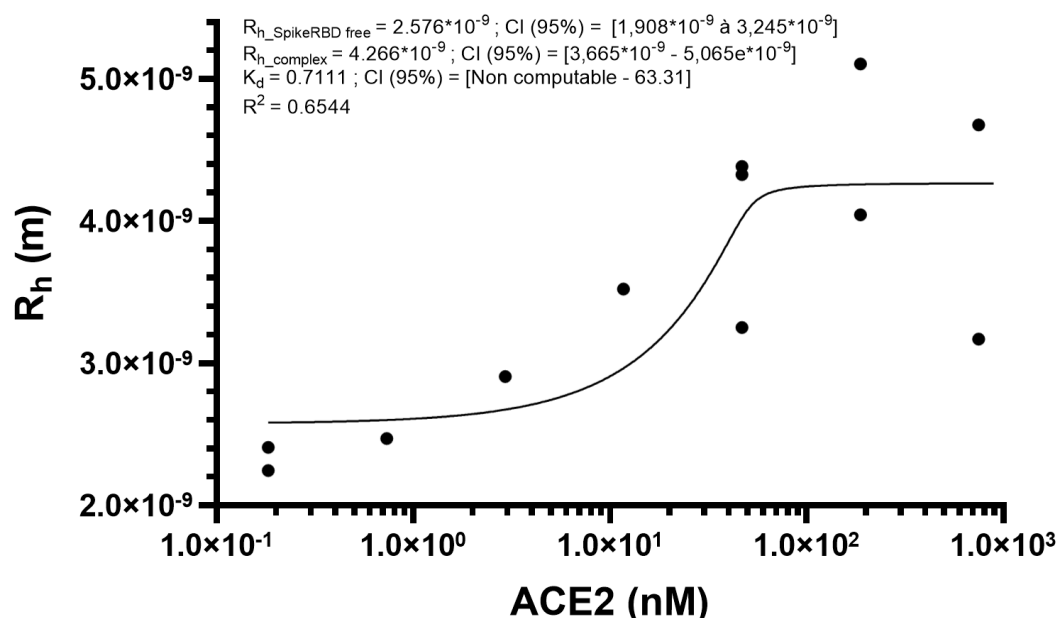

**Figure S2** : Microfluidic Difusional Sizing determination of K<sub>D</sub> for the SpikeRBD (20 nM)/ ACE2 complex (DMSO, 1% v/v; room t °). R<sub>h</sub> as a function of ACE2 concentration. [ACE2], 180 pM-750 nM; [SpikeRBD]; 20 nM; mean ± standard deviation (n = 3). All data points were obtained on a single chip: ACE2 concentrations were injected in the ascending order, remaining traces of the previous sample being carefully removed using a micropipette.

It should be noted that 3 replicates measurements were feasible for only one point: [ACE2] = 46.9 nM; for the other replicates, an error message was displayed, indicating an instrumental error (? Microbubbles probably).

It is not reliable to use only one chip to determine the  $K_D$ , which is consistent with the conclusion of the previous test.

All subsequent experiments were performed using 1 chip/ $R_h$  measurement.

### 3. Accuracy (accuracy) in the measurement of the hydrodynamic radius of SpikeRBD<sub>labelled</sub>

A theoretical value of SpikeRBD<sub>labelled</sub>  $R_h$  was computed with a software proposed by Fluidic Analytics (<https://www.fluidic.com/calculators-page/>), by encoding the molecular weight of the protein (31.25 kDa), and selecting a “Folded (globular)” state. The theoretical  $R_h$  was estimated at 2.72 nm, based on the Stokes-Einstein equation, and on proprietary calibration curves [1, 2].

To determine the accuracy of MDS measurements, these were compared to the theoretical  $R_h$  (Table S3).

**Table S3 Determination of  $R_h$  in different conditions – Comparison to theoretical  $R_h$**

| Sample                             | t° of chip (°C) | [SpikeRBD <sub>labelled</sub> ] (nM) | $R_h$ (nm) | Relative $R_h$ (%) |
|------------------------------------|-----------------|--------------------------------------|------------|--------------------|
| Labelling 1 – PBS-T (n = 3)        | 23.1            | 50                                   | 3.03       | 111.40             |
|                                    | 22.3            | 50                                   | 2.94       | 108.09             |
|                                    | 21.1            | 50                                   | 2.74       | 100.74             |
| Labelling 2 – PBS-T (n = 3)        | 22.6            | 50                                   | 2.76       | 101.47             |
|                                    | 23.3            | 50                                   | 2.93       | 107.72             |
|                                    | 21.9            | 50                                   | 2.82       | 103.68             |
| Protein dissolved in MiliQ water   | 22.8            | 20                                   | 3.01       | 110.66             |
| Protein dissolved in PBS-T         | 23.4            | 20                                   | 2.92       | 107.35             |
|                                    | 23.8            | 5                                    | 2.90       | 106.69             |
|                                    | 23.8            | 5                                    | 2.76       | 101.62             |
|                                    | 26.1            | 5                                    | 2.49       | 91.43              |
| Protein dissolved in DMSO 1 %, v/v | 25.2            | 20                                   | 3.06       | 112.61             |
|                                    | 25.6            | 20                                   | 2.89       | 106.18             |
| Mean                               |                 |                                      | 2.87       | 105.4              |
| Standard Deviation                 |                 |                                      | 0.15       | 5.7                |

The mean  $R_h$  was measured at  $2.87 \pm 0.15$  nm, which represents a recovery rate of the theoretical value of  $105.4 \pm 5.7$  %.

#### 4. Precision

- Inter-day precision on the hydrodynamic radius of SpikeRBD<sub>labelled</sub>

**Table S4 Inter-day variability of SpikeRBD<sub>labelled</sub> R<sub>h</sub> -**

| Context of the measure            | Date       | [SpikeRBD <sub>labelled</sub> ] (nM) | Mean R <sub>h</sub> (nm) |
|-----------------------------------|------------|--------------------------------------|--------------------------|
| Labelling 1                       | 2022/01/19 | 50                                   | 2.900                    |
| Labelling 2                       | 2022/02/18 | 50                                   | 2.840                    |
| Protein dissolved in PBS-T        | 2022/01/20 | 5                                    | 2.902                    |
|                                   | 2022/01/21 | 5                                    | 2.764                    |
|                                   | 2022/01/24 | 5                                    | 2.487                    |
| Protein dissolved in DMSO 1 % v/v | 2022/02/21 | 20                                   | 3.063                    |
|                                   | 2022/02/21 | 20                                   | 2.888                    |
| Mean                              |            |                                      | 2.83                     |
| Standard Deviation                |            |                                      | 0.18                     |
| Relative Standard Deviation (%)   |            |                                      | 6.27                     |

The inter-day ( $2.83 \pm 0.18$  nm) and within-day precision ( $2.87 \pm 0.11$ ; Table S1) are of the same order.

- Intra-day precision on the hydrodynamic radius of the complex SpikeRBD<sub>labelled</sub>/ACE2

**Table S5 Intra-day and total variability of the R<sub>h</sub> for the complex SpikeRBD<sub>labelled</sub>/ACE2**

|                                           |       |       |       |
|-------------------------------------------|-------|-------|-------|
| [SpikeRBD <sub>labelled</sub> ] (nM)      | 20    | 20    | 20    |
| [ACE2] (nM)                               | 0.183 | 20    | 750   |
| R <sub>h</sub> 1 (nM) - Curve 1           | 3.105 | 3.580 | 4.374 |
| R <sub>h</sub> 2 (nM) - Curve 1           | 3.019 | 3.309 | 4.210 |
| R <sub>h</sub> 4 (nM) - Curve 2           | 2.679 | 3.294 | 4.391 |
| R <sub>h</sub> 5 (nM) - Curve 2           | 2.807 | 3.255 | 4.396 |
| Intra-day relative standard deviation (%) |       | 2.90  |       |

A 2-ways ANOVA was performed to determine the coefficients of variation. We find that our determination of the mean R<sub>h</sub> for each point of the curve shows an intra-day variation of 2.90%.

- Inter-day precision on the  $K_D$  of the SpikeRBD/ACE2 complex

**Table S6 within-day variability of SpikeRBD/ACE2  $K_D$**

| Context of the measure                 | Date       | T° of chip (°C) | [SpikeRBD <sub>labelled</sub> ] (nM) | [ACE2] (nM) | $K_D$ (nM) |
|----------------------------------------|------------|-----------------|--------------------------------------|-------------|------------|
| Proteins dissolved in PBS-T            | 2022/01/20 | 23.8            | 5                                    | 0.180-750   | 30.24      |
|                                        | 2022/01/21 | 23.8            | 5                                    | 0.180-750   | 33.39      |
|                                        | 2022/01/24 | 26.1            | 5                                    | 0.180-750   | 28.00      |
| Proteins dissolved in in DMSO 1 %, v/v | 2022/02/21 | 25.2            | 20                                   | 0.180-750   | 45.32      |
|                                        | 2022/02/21 | 25.6            | 20                                   | 0.180-750   | 30.00      |
| Mean                                   |            |                 |                                      |             | 33.39      |
| Standard Deviation                     |            |                 |                                      |             | 6.94       |
| Relative Standard Deviation (%)        |            |                 |                                      |             | 20.79      |

## 5. Quality of curve fitting

The data obtained during the  $K_D$  determination are sigmoidal. Applying nonlinear least-squares fitting method [3], a coefficient of determination ( $R^2$ ) was calculated.

**Table S7 Quality of adjustment - Determination of the  $R^2$**

| Context of the measure                        | [SpikeRBD <sub>labelled</sub> ] (nM) | [ACE2] (nM) | $R^2$  |
|-----------------------------------------------|--------------------------------------|-------------|--------|
| $K_D$ Determination in PBS-T - curve 1        | 5                                    | 0.180-750   | 0.8542 |
| $K_D$ Determination in PBS-T - curve 2        | 5                                    | 0.180-750   | 0.9227 |
| $K_D$ Determination in PBS-T - curve 3        | 5                                    | 0.180-750   | 0.943  |
| $K_D$ Determination in DMSO 1 % v/v - Curve 1 | 20                                   | 0.180-750   | 0.9423 |
| $K_D$ Determination in DMSO 1 % v/v - Curve 2 | 20                                   | 0.180-750   | 0.9626 |
| Mean                                          |                                      |             | 0.925  |
| Standard Deviation                            |                                      |             | 0.042  |

## 6. References

1. Fluidic Analytics. Available online: <https://www.fluidic.com/resources/hydrodynamic-radius-and-protein-weight/> [Accessed 09 april 2022].
2. Fluidic Analytics. Available online: <https://www.fluidic.com/calculators-page/> [Accessed 23 october 2023].
3. FIEDLER, S., PIZIORSKA, M. A., DENNINGER, V., MORGUNOV, A. S., ILSLEY, A., MALIK, A. Y., SCHNEIDER, M. M., DEVENISH, S. R. A., MEISL, G., KOSMOLIAPTIS, V., AGUZZI, A., FIEGLER, H. & KNOWLES, T. P. J. Antibody Affinity Governs the Inhibition of SARS-CoV-2 Spike/ACE2 Binding in Patient Serum. *ACS Infectious Diseases* **2021**, 7: 2362-2369. doi:10.1021/acsinfecdis.1c00047
